# Supplementary material for: Prion Strain Differences in Accumulation of PrPSc on Neurons and Glia Are Associated with Similar Expression Profiles of Neuroinflammatory Genes: Comparison of Three Prion Strains
Source: PubMed Central journal article supplement (PMC4821575; doi:10.1371/journal.ppat.1005551), 2016-04-05
Supplement: ppat.1005551.s001.pdf [file ppat.1005551.s001.pdf]

**S1 Table.** Alphabetical list of the eighty-six neuroinflammatory genes assessed by qRT-PCR.

| <b>Gene</b>   | <b>Description</b>                                                                 |
|---------------|------------------------------------------------------------------------------------|
| <i>Aimp1</i>  | Aminoacyl tRNA synthetase complex-interacting multifunctional protein 1            |
| <i>Aif1</i>   | Allograft Inflammatory Factor 1 (Ionized Calcium-Binding Adapter Molecule 1, Iba1) |
| <i>Bmp2</i>   | Bone morphogenetic protein 2                                                       |
| <i>Ccl1</i>   | Chemokine (C-C motif) ligand 1                                                     |
| <i>Ccl11</i>  | Chemokine (C-C motif) ligand 11                                                    |
| <i>Ccl12</i>  | Chemokine (C-C motif) ligand 12                                                    |
| <i>Ccl17</i>  | Chemokine (C-C motif) ligand 17                                                    |
| <i>Ccl19</i>  | Chemokine (C-C motif) ligand 19                                                    |
| <i>Ccl2</i>   | Chemokine (C-C motif) ligand 2                                                     |
| <i>Ccl20</i>  | Chemokine (C-C motif) ligand 20                                                    |
| <i>Ccl22</i>  | Chemokine (C-C motif) ligand 22                                                    |
| <i>Ccl24</i>  | Chemokine (C-C motif) ligand 24                                                    |
| <i>Ccl3</i>   | Chemokine (C-C motif) ligand 3                                                     |
| <i>Ccl4</i>   | Chemokine (C-C motif) ligand 4                                                     |
| <i>Ccl5</i>   | Chemokine (C-C motif) ligand 5                                                     |
| <i>Ccl6</i>   | Chemokine (C-C motif) ligand 6                                                     |
| <i>Ccl7</i>   | Chemokine (C-C motif) ligand 7                                                     |
| <i>Ccl8</i>   | Chemokine (C-C motif) ligand 8                                                     |
| <i>Ccl9</i>   | Chemokine (C-C motif) ligand 9                                                     |
| <i>Ccr1</i>   | Chemokine (C-C motif) receptor 1                                                   |
| <i>Ccr10</i>  | Chemokine (C-C motif) receptor 10                                                  |
| <i>Ccr2</i>   | Chemokine (C-C motif) receptor 2                                                   |
| <i>Ccr3</i>   | Chemokine (C-C motif) receptor 3                                                   |
| <i>Ccr4</i>   | Chemokine (C-C motif) receptor 4                                                   |
| <i>Ccr5</i>   | Chemokine (C-C motif) receptor 5                                                   |
| <i>Ccr6</i>   | Chemokine (C-C motif) receptor 6                                                   |
| <i>Ccr8</i>   | Chemokine (C-C motif) receptor 8                                                   |
| <i>Cd40lg</i> | CD40 ligand                                                                        |
| <i>Csf1</i>   | Colony stimulating factor 1 (macrophage)                                           |
| <i>Csf2</i>   | Colony stimulating factor 2 (granulocyte-macrophage)                               |
| <i>Csf3</i>   | Colony stimulating factor 3 (granulocyte)                                          |
| <i>Cx3cl1</i> | Chemokine (C-X3-C motif) ligand 1                                                  |
| <i>Cxcl1</i>  | Chemokine (C-X-C motif) ligand 1                                                   |
| <i>Cxcl10</i> | Chemokine (C-X-C motif) ligand 10                                                  |
| <i>Cxcl11</i> | Chemokine (C-X-C motif) ligand 11                                                  |
| <i>Cxcl12</i> | Chemokine (C-X-C motif) ligand 12                                                  |
| <i>Cxcl13</i> | Chemokine (C-X-C motif) ligand 13                                                  |
| <i>Cxcl15</i> | Chemokine (C-X-C motif) ligand 15                                                  |
| <i>Cxcl5</i>  | Chemokine (C-X-C motif) ligand 5                                                   |
| <i>Cxcl9</i>  | Chemokine (C-X-C motif) ligand 9                                                   |
| <i>Cxcr2</i>  | Chemokine (C-X-C motif) receptor 2                                                 |
| <i>Cxcr3</i>  | Chemokine (C-X-C motif) receptor 3                                                 |
| <i>Cxcr5</i>  | Chemokine (C-X-C motif) receptor 5                                                 |
| <i>Fasl</i>   | Fas ligand (TNF superfamily, member 6)                                             |
| <i>Ifng</i>   | Interferon gamma                                                                   |
| <i>Il10ra</i> | Interleukin 10 receptor, alpha                                                     |
| <i>Il10rb</i> | Interleukin 10 receptor, beta                                                      |
| <i>Il11</i>   | Interleukin 11                                                                     |
| <i>Il12b</i>  | Interleukin 12 p40                                                                 |
| <i>Il13</i>   | Interleukin 13                                                                     |

|                  |                                                                          |
|------------------|--------------------------------------------------------------------------|
| <i>Il15</i>      | Interleukin 15                                                           |
| <i>Il16</i>      | Interleukin 16                                                           |
| <i>Il17a</i>     | Interleukin 17A                                                          |
| <i>Il17b</i>     | Interleukin 17B                                                          |
| <i>Il17f</i>     | Interleukin 17F                                                          |
| <i>Il1a</i>      | Interleukin 1 alpha                                                      |
| <i>Il1b</i>      | Interleukin 1 beta                                                       |
| <i>Il1r1</i>     | Interleukin 1 receptor, type I                                           |
| <i>Il1rn</i>     | Interleukin 1 receptor antagonist                                        |
| <i>Il21</i>      | Interleukin 21                                                           |
| <i>Il27</i>      | Interleukin 27                                                           |
| <i>Il2rb</i>     | Interleukin 2 receptor, beta chain                                       |
| <i>Il2rg</i>     | Interleukin 2 receptor, gamma chain                                      |
| <i>Il3</i>       | Interleukin 3                                                            |
| <i>Il33</i>      | Interleukin 33                                                           |
| <i>Il4</i>       | Interleukin 4                                                            |
| <i>Il5</i>       | Interleukin 5                                                            |
| <i>Il5ra</i>     | Interleukin 5 receptor, alpha                                            |
| <i>Il6ra</i>     | Interleukin 6 receptor, alpha                                            |
| <i>Il6st</i>     | Interleukin 6 signal transducer                                          |
| <i>Il7</i>       | Interleukin 7                                                            |
| <i>Lta</i>       | Lymphotoxin A                                                            |
| <i>Ltb</i>       | Lymphotoxin B                                                            |
| <i>Mif</i>       | Macrophage migration inhibitory factor                                   |
| <i>Nampt</i>     | Nicotinamide phosphoribosyltransferase                                   |
| <i>Osm</i>       | Oncostatin M                                                             |
| <i>Pf4</i>       | Platelet factor 4                                                        |
| <i>Spp1</i>      | Secreted phosphoprotein 1                                                |
| <i>Tnf</i>       | Tumor necrosis factor                                                    |
| <i>Tnfrsf11b</i> | Tumor necrosis factor receptor superfamily, member 11b (osteoprotegerin) |
| <i>Tnfsf10</i>   | Tumor necrosis factor (ligand) superfamily, member 10                    |
| <i>Tnfsf11</i>   | Tumor necrosis factor (ligand) superfamily, member 11                    |
| <i>Tnfsf13</i>   | Tumor necrosis factor (ligand) superfamily, member 13                    |
| <i>Tnfsf13b</i>  | Tumor necrosis factor (ligand) superfamily, member 13b                   |
| <i>Tnfsf4</i>    | Tumor necrosis factor (ligand) superfamily, member 4                     |
| <i>Vegfa</i>     | Vascular endothelial growth factor A                                     |
