# Supplementary material for: Prion Strain Differences in Accumulation of PrPSc on Neurons and Glia Are Associated with Similar Expression Profiles of Neuroinflammatory Genes: Comparison of Three Prion Strains
Source: PubMed Central journal article supplement (PMC4821575; doi:10.1371/journal.ppat.1005551), 2016-04-05
Supplement: ppat.1005551.s002.pdf [file ppat.1005551.s002.pdf]

**S2 Table.** Mouse inflammatory gene expression profiles during LaCrosse virus (LACV) versus 22L scrapie infection relative to uninfected mice.

| Genes not increased in LACV or scrapie | Genes increased in LACV only |               | Genes increased in scrapie and LACV |               |               |
|----------------------------------------|------------------------------|---------------|-------------------------------------|---------------|---------------|
|                                        | Gene                         | FC LACV 5 dpi | Gene                                | FC LACV 5 dpi | FC 22L 80 dpi |
|                                        | <i>Bmp2</i>                  |               | <i>Cxcl11</i>                       | 249.0***      |               |
|                                        | <i>Ccl17</i>                 |               | <i>Cxcl1</i>                        | 240.5***      |               |
|                                        | <i>Ccr10</i>                 |               | <i>Ifng</i>                         | 229.1***      |               |
|                                        | <i>Cx3cl1</i>                |               | <i>Cd40lg</i>                       | 67.6***       |               |
|                                        | <i>Cxcl12</i>                |               | <i>Ccl20</i>                        | 45.6***       |               |
|                                        | <i>Fasl</i>                  |               | <i>Il3</i>                          | 29.9**        |               |
|                                        | <i>Il16</i>                  |               | <i>Ccr4</i>                         | 27.1***       |               |
|                                        | <i>Il6st</i>                 |               | <i>Ccr2</i>                         | 24.4***       |               |
|                                        | <i>Mif</i>                   |               | <i>Cxcr5</i>                        | 21.3***       |               |
|                                        | <i>Pf4</i>                   |               | <i>Il13</i>                         | 21.0***       |               |
|                                        | <i>Tnfrsf11b</i>             |               | <i>Cxcl15</i>                       | 18.9***       |               |
|                                        | <i>Vegfa</i>                 |               | <i>Tnfsf10</i>                      | 18.4***       |               |
|                                        |                              |               | <i>Il4</i>                          | 11.3***       |               |
|                                        |                              |               | <i>Ccl19</i>                        | 10.4***       |               |
|                                        |                              |               | <i>Il11</i>                         | 10.1***       |               |
|                                        |                              |               | <i>Ccr5</i>                         | 8.9***        |               |
|                                        |                              |               | <i>Ccl22</i>                        | 7.1**         |               |
|                                        |                              |               | <i>Il6ra</i>                        | 7.0***        |               |
|                                        |                              |               | <i>Il5ra</i>                        | 6.4***        |               |
|                                        |                              |               | <i>Il15</i>                         | 5.4***        |               |
|                                        |                              |               | <i>Ccl24</i>                        | 5.3*          |               |
|                                        |                              |               | <i>Ccr8</i>                         | 5.0**         |               |
|                                        |                              |               | <i>Ltb</i>                          | 4.4**         |               |
|                                        |                              |               | <i>Lta</i>                          | 4.2*          |               |
|                                        |                              |               | <i>Ccr6</i>                         | 3.7**         |               |
|                                        |                              |               | <i>Ccl1</i>                         | 2.8***        |               |
|                                        |                              |               | <i>Il17b</i>                        | 2.8***        |               |
|                                        |                              |               | <i>Spp1</i>                         | 2.7**         |               |
|                                        |                              |               | <i>Il1r1</i>                        | 2.6***        |               |
|                                        |                              |               | <i>Spp1</i>                         | 2.5**         |               |
|                                        |                              |               | <i>Cx3cr1</i>                       | 2.1***        |               |
|                                        |                              |               | <i>Il10rb</i>                       | 2.1***        |               |

FC = Fold Change in expression in infected mice vs. uninfected control mice. 69 genes analyzed.

\* P value ≤ 0.05, \*\* P value ≤ 0.01, \*\*\* P value ≤ 0.001

No genes were increased in scrapie only.
