# Supplementary material for: Prion Strain Differences in Accumulation of PrPSc on Neurons and Glia Are Associated with Similar Expression Profiles of Neuroinflammatory Genes: Comparison of Three Prion Strains
Source: PubMed Central journal article supplement (PMC4821575; doi:10.1371/journal.ppat.1005551), 2016-04-05
Supplement: ppat.1005551.s003.pdf [file ppat.1005551.s003.pdf]

**S3 Table.** Mouse inflammatory gene expression profiles during BE retrovirus versus 22L scrapie infection relative to uninfected mice.

| Genes not increased in BE or scrapie | Genes increased in BE only |                 | Genes increased in scrapie and BE |                 |               | Genes increased in scrapie only |
|--------------------------------------|----------------------------|-----------------|-----------------------------------|-----------------|---------------|---------------------------------|
|                                      | Gene                       | FC BE 21-28 dpi | Gene                              | FC BE 21-28 dpi | FC 22L 80 dpi |                                 |
| <i>Ccl1</i>                          | <i>Cxcl11</i>              | 5.3***          | <i>Cxcl10</i>                     | 149.1***        | 78.9***       | <i>Ccl9</i>                     |
| <i>Ccl17</i>                         | <i>Cxcl1</i>               | 3.6***          | <i>Ccl4</i>                       | 11.9***         | 31.5***       | <i>Ccl6</i>                     |
| <i>Ccl19</i>                         |                            |                 | <i>Cxcl9</i>                      | 45.9***         | 26.4**        | <i>Il2rg</i>                    |
| <i>Ccl22</i>                         |                            |                 | <i>Cxcl13</i>                     | 52.3***         | 23.9***       | <i>Aif1</i>                     |
| <i>Ccr10</i>                         |                            |                 | <i>Ccl5</i>                       | 13.9***         | 18.7***       | <i>Gpr84</i>                    |
| <i>Ccr2</i>                          |                            |                 | <i>Ccl2</i>                       | 14.4***         | 15.3***       | <i>Ccr3</i>                     |
| <i>Ccr4</i>                          |                            |                 | <i>Tnf</i>                        | 6.5*            | 15.2***       | <i>Il2rb</i>                    |
| <i>Ccr5</i>                          |                            |                 | <i>Ccl12</i>                      | 14.6***         | 13.4***       | <i>Cxcr3</i>                    |
| <i>Ccr6</i>                          |                            |                 | <i>Gfap</i>                       | 4.2***          | 10.9***       | <i>Ccr1</i>                     |
| <i>Ccr8</i>                          |                            |                 | <i>Ccl8</i>                       | 9.5**           | 9.9***        | <i>Cxcl5</i>                    |
| <i>Cd40lg</i>                        |                            |                 | <i>Il1b</i>                       | 2.6***          | 8.8***        | <i>Il10ra</i>                   |
| <i>Csf2</i>                          |                            |                 | <i>Ccl3</i>                       | 7.3***          | 7.9***        |                                 |
| <i>Csf3</i>                          |                            |                 | <i>Ccl7</i>                       | 7.1***          | 6.3***        |                                 |
| <i>Cx3cl1</i>                        |                            |                 | <i>Il1a</i>                       | 5.7**           | 4.2***        |                                 |
| <i>Cxcl12</i>                        |                            |                 | <i>Ccl11</i>                      | 4.2**           | 2.3**         |                                 |
| <i>Cxcl15</i>                        |                            |                 |                                   |                 |               |                                 |
| <i>Cxcr5</i>                         |                            |                 |                                   |                 |               |                                 |
| <i>Ifng</i>                          |                            |                 |                                   |                 |               |                                 |
| <i>Il10rb</i>                        |                            |                 |                                   |                 |               |                                 |
| <i>Il11</i>                          |                            |                 |                                   |                 |               |                                 |
| <i>Il13</i>                          |                            |                 |                                   |                 |               |                                 |
| <i>Il15</i>                          |                            |                 |                                   |                 |               |                                 |
| <i>Il16</i>                          |                            |                 |                                   |                 |               |                                 |
| <i>Il17b</i>                         |                            |                 |                                   |                 |               |                                 |
| <i>Il1r1</i>                         |                            |                 |                                   |                 |               |                                 |
| <i>Il4</i>                           |                            |                 |                                   |                 |               |                                 |
| <i>Il5ra</i>                         |                            |                 |                                   |                 |               |                                 |
| <i>Il6ra</i>                         |                            |                 |                                   |                 |               |                                 |
| <i>Il6st</i>                         |                            |                 |                                   |                 |               |                                 |
| <i>Lta</i>                           |                            |                 |                                   |                 |               |                                 |
| <i>Ltb</i>                           |                            |                 |                                   |                 |               |                                 |
| <i>Mif</i>                           |                            |                 |                                   |                 |               |                                 |
| <i>Pf4</i>                           |                            |                 |                                   |                 |               |                                 |
| <i>Spp1</i>                          |                            |                 |                                   |                 |               |                                 |

FC = Fold Change in expression in infected vs. uninfected control mice. 62 total genes analyzed.

\* P value ≤ 0.05, \*\* P value ≤ 0.01, \*\*\* P value ≤ 0.001
